# Supplementary material for: Cu and Zn promoted Al-fumarate metal organic frameworks for electrocatalytic CO2 reduction
Source: Royal Society of Chemistry journal article supplement (doi:10.1039/d3ra07639c), 2024-01-01
Supplement: d3ra07639c1.pdf [file d3ra07639c1.pdf]

## Supporting Information

### Cu and Zn promoted Al-fumarate metal organic frameworks for electrocatalytic CO<sub>2</sub> reduction

Ung Thi Dieu Thuy<sup>1,\*</sup>, Tran Ngoc Huan<sup>2,\*</sup>, Sandrine Zanna<sup>3</sup>, Karen Wilson<sup>4</sup>, Adam Lee<sup>4</sup>, Ngoc-Diep Le,<sup>2</sup> Jim Mensah,<sup>5</sup> Venkata D.B.C Dasireddy<sup>4</sup> and Nguyen Quang Liem<sup>1,\*</sup>

<sup>1</sup>Institute of Materials Science, Vietnam Academy of Science and Technology, 18 Hoang Quoc Viet, Cau Giay, Hanoi, Vietnam

<sup>2</sup>Laboratoire de Chimie des Processus Biologiques, Collège de France, Sorbonne Université, 11 Place Marcelin Berthelot, 75231 Paris Cedex 05, France

<sup>3</sup>Chimie ParisTech, PSL Research University, CNRS, Institut de Recherche de Chimie Paris (IRCP), 11 rue Pierre et Marie Curie, 75005 Paris, France

<sup>4</sup>School of Environment & Science, Centre for Catalysis and Clean Energy, Griffith University, Gold Coast Campus, QLD 4222, Australia

<sup>5</sup>Centre for Applied Materials and Industrial Chemistry (CAMIC), RMIT University, Australia

\* Corresponding authors. E-mails: [dieuthuy@ims.vast.vn](mailto:dieuthuy@ims.vast.vn); [ngoc-huan.tran@college-de-france.fr](mailto:ngoc-huan.tran@college-de-france.fr); [liemngq@vast.vn](mailto:liemngq@vast.vn)

## S1 Experimental

### CO<sub>2</sub> electroreduction product analysis:

*Gaseous products:* An on-line gas chromatograph (SRI instruments, MG#5 GC, Ar carrier) was employed to quantify C<sub>2</sub>H<sub>4</sub>, H<sub>2</sub>, CO and CH<sub>4</sub> production. Quantification of H<sub>2</sub> was performed by a thermal conductivity detector with a HaySepD precolumn attached to a 3 m molecular sieve column used to separate H<sub>2</sub> from the other gases. Carbon-containing products were analyzed using a flame-ionization detector with CO and CH<sub>4</sub> separated using a 3 m molecular sieve column, and C<sub>2</sub>H<sub>4</sub> and C<sub>2</sub>H<sub>6</sub> separated using a 5 m HaySepD column. The GC was calibrated with a gas mixture containing H<sub>2</sub>, CO, CH<sub>4</sub>, C<sub>2</sub>H<sub>4</sub>, C<sub>2</sub>H<sub>6</sub> and CO<sub>2</sub> as the diluent. Calibration curves for each molecule were obtained by further diluting the gas mixture with CO<sub>2</sub> (both provided by mass flow controllers) before injecting to the GC.

*Liquid products:* Liquid product yields were determined by ionic chromatography (Metrohm™ EcoIC) and proton nuclear magnetic resonance spectroscopy (<sup>1</sup>H-NMR; Bruker Avance III 300 MHz, 300 K). 400 μL of reacted catholyte, 100 μL D<sub>2</sub>O (Eurisotop, 99.9%) as a locking solvent and 100 μL of 5 mM aqueous terephthalic acid solution (terephthalic acid, Sigma-Aldrich, 98%) as a reference were mixed and water peaks for each spectrum eliminated by a Pre-SAT180 water suppression method.

Faradaic efficiencies for each product was calculated using the following equation:

$$FE_x(\%) = \frac{n_x \times n_{e-x} \times F}{Q} \times 100$$

where  $n_x$  is the mols of product  $x$ ,  $n_{e-x}$  is the number of electrons required to generate product  $x$  from CO, CO<sub>2</sub> or H<sub>2</sub>O,  $F$  is the Faraday constant (96500 C.mol<sup>-1</sup>), and  $Q$  the charge passed to generate  $n_x$ .

**Water adsorption analysis:** The samples were placed into a small climate chamber with controlled temperature and relative humidity (TA Instruments, Universal V4.5A). The water adsorption of samples was evaluated at 30 °C and ~90% relative humidity.

## S2 Results

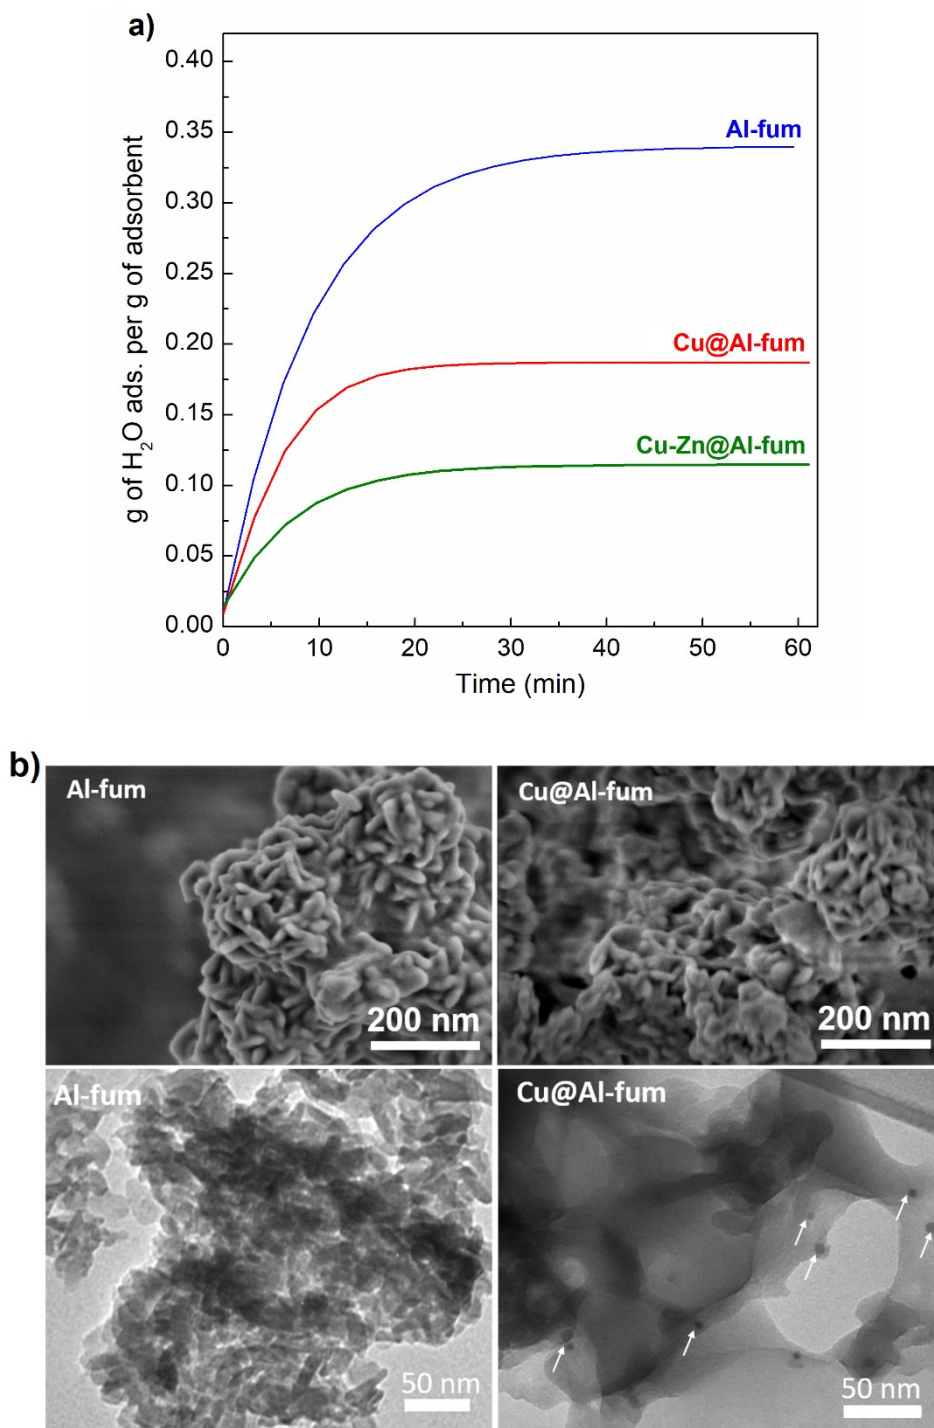

**Figure S1.** (a) Water adsorption on Al-fum, Cu@Al-fum and Cu-Zn@Al-fum and (b) SEM (top) and TEM (below) images of Al-fum and Cu@Al-fum MOFs.

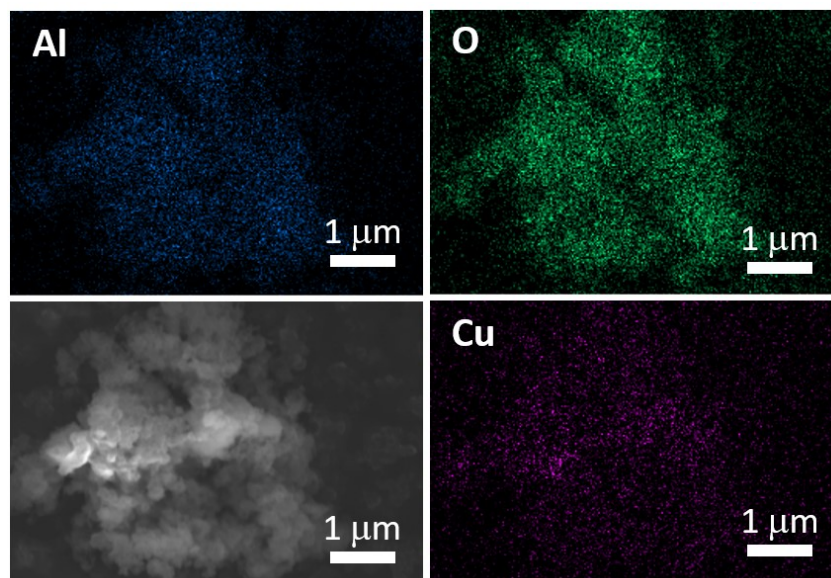

**Figure S2.** SEM image and corresponding EDX elemental maps of Al, O and Cu for Cu@Al-fum.

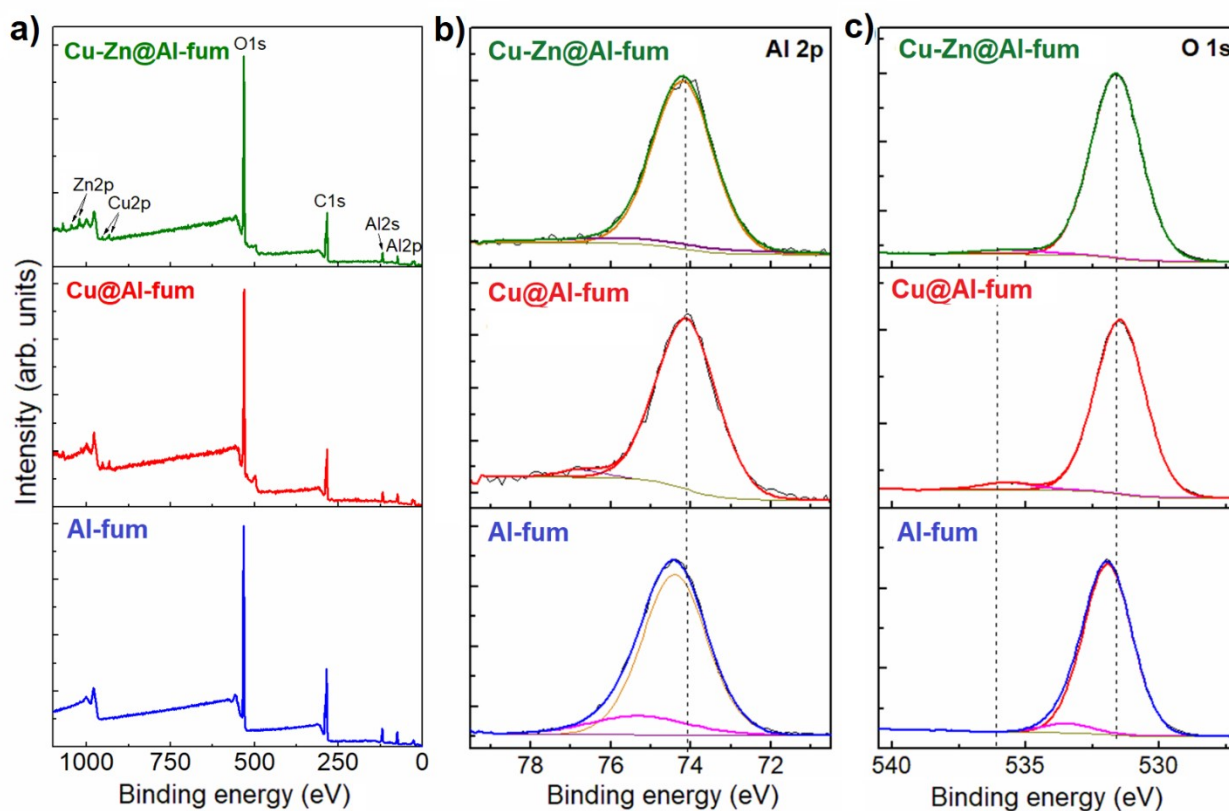

**Figure S3.** (a) Survey, (b) Al 2p and (c) O 1s XPS spectra of the pristine Al-fum, Cu@Al-fum and Cu-Zn@Al-fum MOFs.

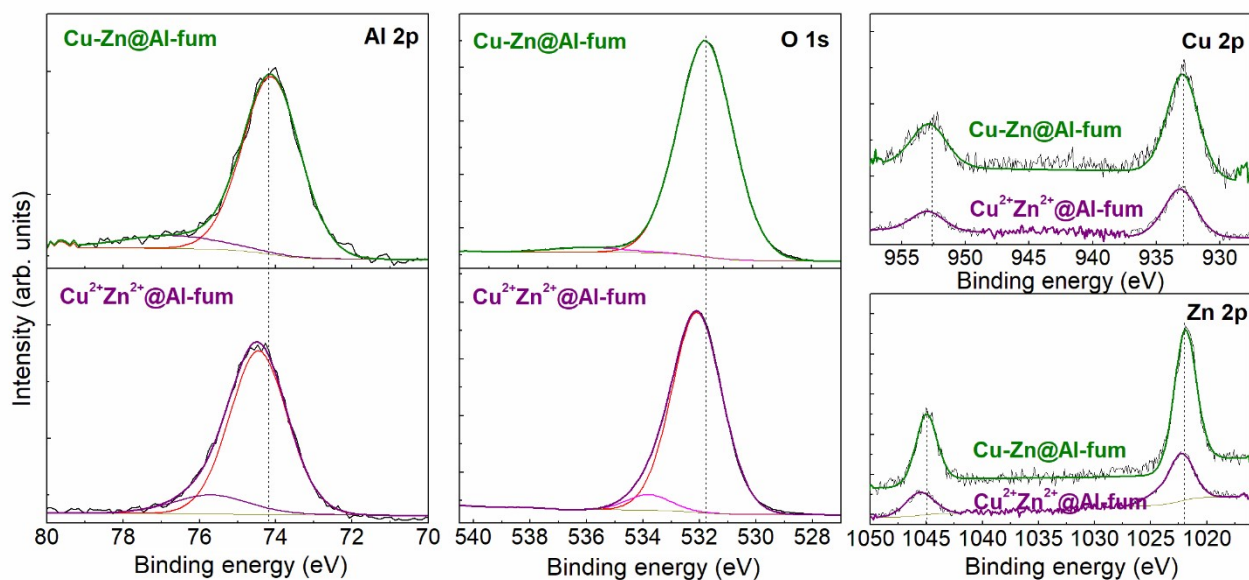

**Figure S4.** Al 2p, O 1s, Cu 2p and Zn 2p XP spectra of Cu-Zn@Al-fum before (designated Cu<sup>2+</sup>Zn<sup>2+</sup>@Al-fum) and after treatment with NaBH<sub>4</sub>.

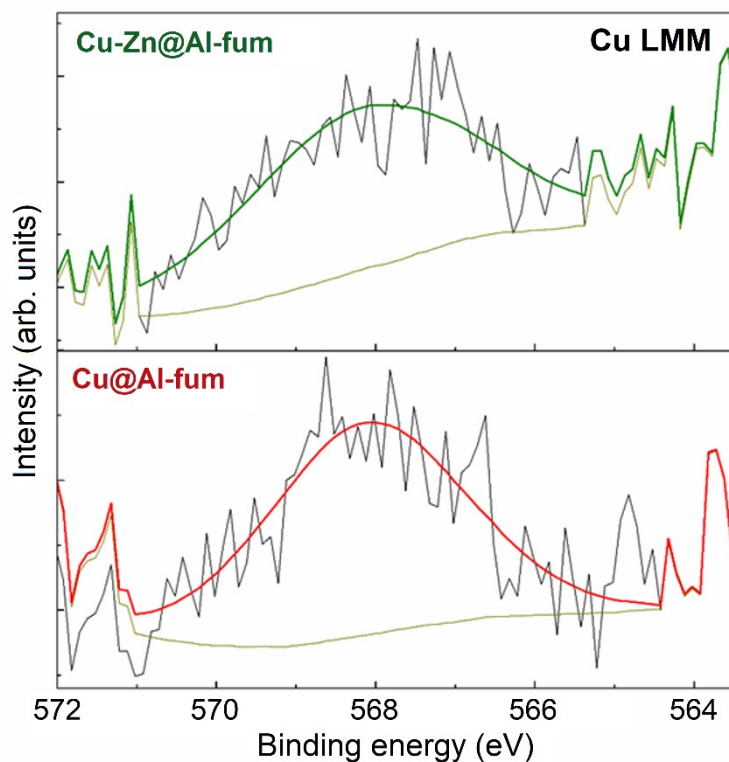

**Figure S5.** Cu LMM Auger spectra of Cu and Cu-Zn doped Al-fum.

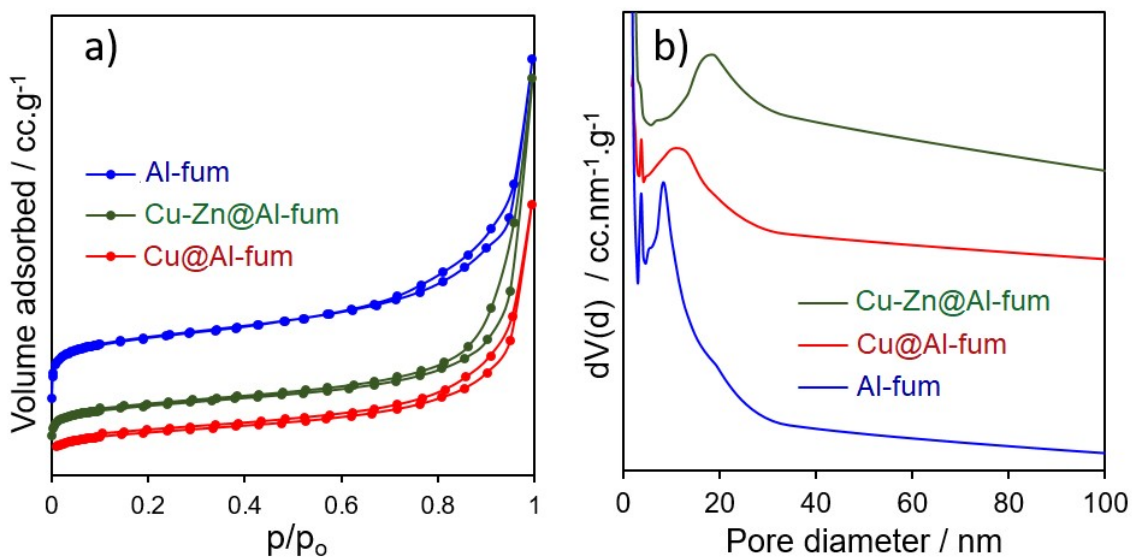

**Figure S6.** (a) N<sub>2</sub> adsorption-desorption isotherms, and (b) BJH pore size distributions of Al-fum, Cu@Al-fum and Cu-Zn@Al-fum MOFs.

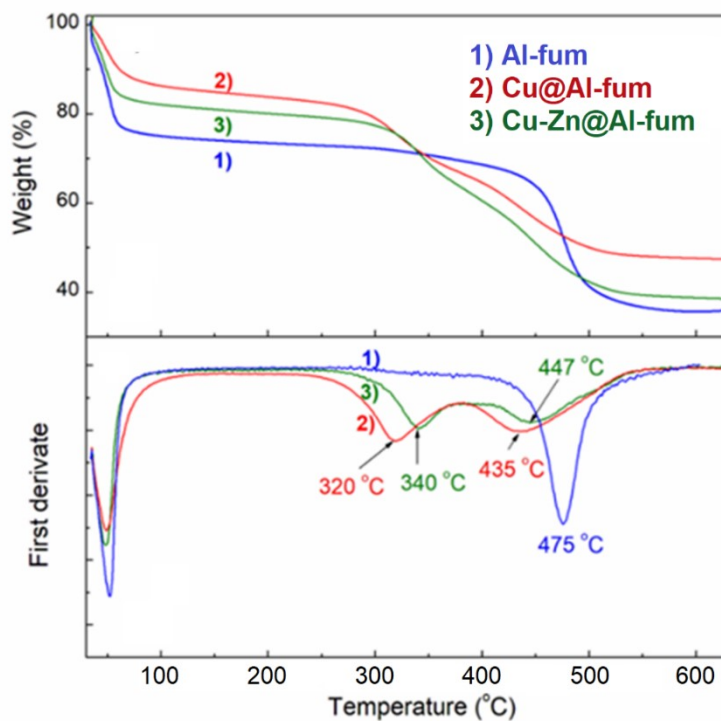

**Figure S7.** Thermogravimetric analysis profiles and corresponding first derivatives of Al-fum, Cu@Al-fum and Cu-Zn@Al-fum.

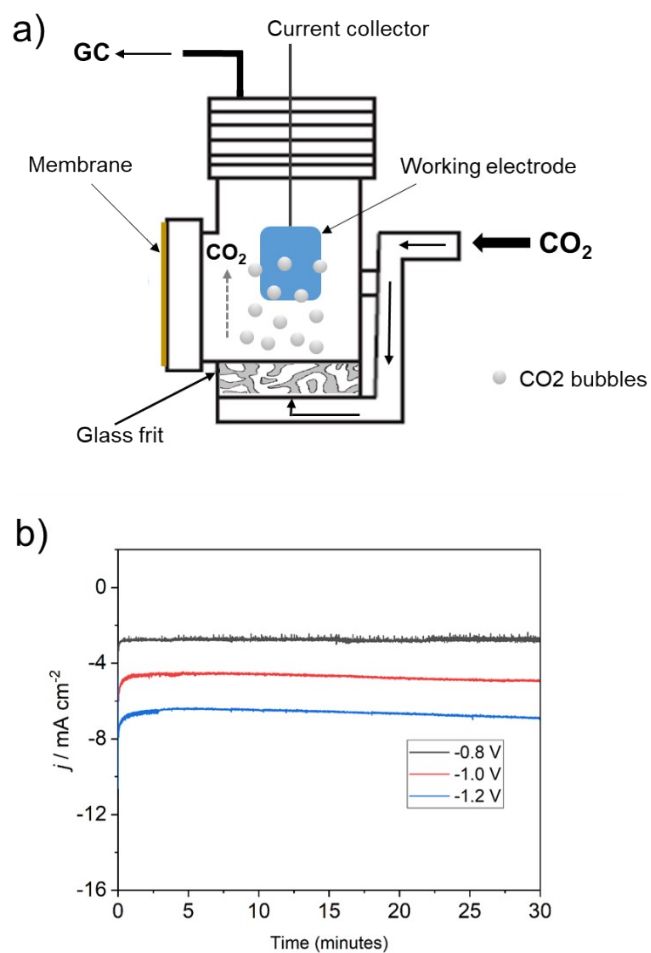

**Figure S8.** (a) Schematic of cathodic electrochemical cell for CO<sub>2</sub> reduction, (b) time-dependent current density of Cu-Zn@Al-fum/gas diffusion electrode at different cathodic potentials. Measurements made in 0.1 M KHCO<sub>3</sub>, saturated with CO<sub>2</sub> bubbled at 7.5 ml/min.

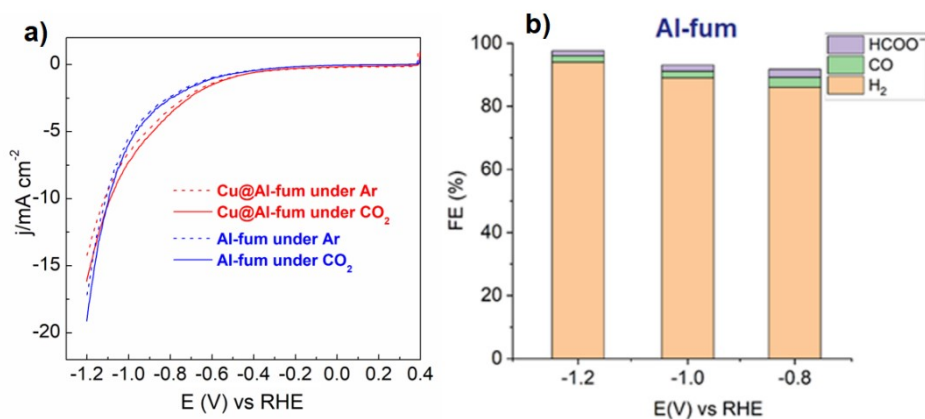

**Figure S9.** (a) Linear sweep voltammetry curves of Al-fum MOF/GDE and Cu@Al-fum in 0.1 M KHCO<sub>3</sub> aqueous solution saturated with CO<sub>2</sub> or Ar, and (b) Faradaic efficiencies for CO<sub>2</sub> reduction products in 0.1 M KHCO<sub>3</sub>-saturated CO<sub>2</sub> at different cathodic potentials of Al-fum MOF/GDE. CO<sub>2</sub> was continuously bubbled at 7.5 mL.min<sup>-1</sup> during electrolysis.

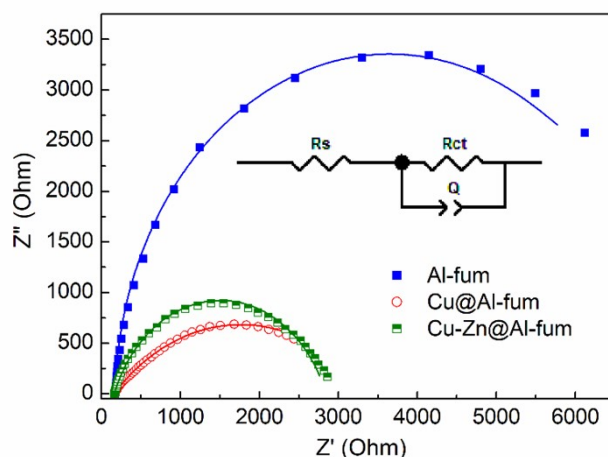

**Figure S10.** Nyquist plots, with fitting curves (solid lines), of Al-fum MOF, Cu@Al-fum, and Cu-Zn@Al-fum samples in CO<sub>2</sub>-saturated 0.1 M KHCO<sub>3</sub> with a frequency  $10^5 \div 10^{-1}$  Hz at 10 mV of amplitude. The equivalent circuit model is shown on the insert.  $R_s$  stands for the contact resistance,  $R_{ct}$  for the charge transfer resistance.

**Table S1.** Quantification of products formed after 30 min CO<sub>2</sub> electroreduction over Al-fum derived electrocatalysts at -1.2V vs RHE.

| <b>Sample</b>       | <b>H<sub>2</sub><br/>(<math>\mu</math>mol)</b> | <b>CO<br/>(<math>\mu</math>mol)</b> | <b>HCOOH<br/>(<math>\mu</math>mol)</b> | <b>CH<sub>4</sub><br/>(<math>\mu</math>mol)</b> | <b>C<sub>2</sub>H<sub>4</sub><br/>(<math>\mu</math>mol)</b> | <b>C<sub>2</sub>H<sub>5</sub>OH<br/>(<math>\mu</math>mol)<sup>a</sup></b> | <b>Selectivity to C<br/>products (%)</b> |
|---------------------|------------------------------------------------|-------------------------------------|----------------------------------------|-------------------------------------------------|-------------------------------------------------------------|---------------------------------------------------------------------------|------------------------------------------|
| <b>Al-fum</b>       | 112.4                                          | 1.23                                | 1.08                                   | -                                               | -                                                           | -                                                                         | 2                                        |
| <b>Cu@Al-fum</b>    | 58.5                                           | 6.64                                | 6.9                                    | 0.49                                            | 0.78                                                        | -                                                                         | 20                                       |
| <b>Cu-Zn@Al-fum</b> | 23.21                                          | 14.91                               | 4.45                                   | 2.22                                            | 0.77                                                        | 0.68                                                                      | 50                                       |

<sup>a</sup>For ethanol analysis, electrolysis sample was collected after 60 min to enable detection by NMR.

**Table S2.** Fitted contact resistance (R<sub>s</sub>) and charge transfer resistance (R<sub>ct</sub>) values from Nyquist plots.

| <b>Electrode</b> | <b>R<sub>s</sub> (Ohm)</b> | <b>R<sub>ct</sub> (Ohm)</b> | <b>Q (Farad)</b> | <b>n</b> |
|------------------|----------------------------|-----------------------------|------------------|----------|
| Al-fum           | 175.38                     | 6943.4                      | 0.00010948       | 0.9837   |
| Cu@Al-fum        | 160.13                     | 3208.3                      | 0.0002241        | 0.5134   |
| Cu-Zn@Al-fum     | 163.42                     | 2681.2                      | 0.00003986       | 0.76914  |
